# Supplementary material for: Microfluidic assessment of mechanical cell damage by extensional stress
Source: Royal Society of Chemistry journal article supplement (doi:10.1039/c5lc01006c), 2015-12-01
Supplement: c5lc01006c2.pdf [file c5lc01006c2.pdf]

# Microfluidic Assessment of Mechanical Cell Damage by Extensional Stress

## *Electronic Supplementary Information*

Young Bok Bae<sup>a</sup>, Hye Kyeong Jang<sup>b</sup>, Tae Hwan Shin<sup>c,d</sup>, Geetika Phukan<sup>c</sup>, Thanh  
Tinh Tran<sup>b</sup>, Gwang Lee<sup>c</sup>, Wook Ryol Hwang<sup>\*b</sup> and Ju Min Kim<sup>\*a,e</sup>

<sup>a</sup>*Department of Energy Systems Research, Ajou University,  
Suwon 443-749, Republic of Korea*

<sup>b</sup>*School of Mechanical Engineering, Research Center for Aircraft Parts Technology,  
Gyeongsang National University,  
Jinju 660-701, Republic of Korea.*

<sup>c</sup>*Department of Physiology and Department of Biomedical Sciences,  
Ajou University School of Medicine, Suwon 443-380, Republic of Korea  
Suwon 443-749, Republic of Korea*

<sup>d</sup>*Department of Molecular Science and Technology,  
Ajou University, Suwon 443-380, Republic of Korea*

<sup>e</sup>*Department of Chemical Engineering, Ajou University,  
Suwon 443-749, Republic of Korea*

**(Last Updated: November 26, 2015)**

*\*To whom correspondence should be addressed.*

<sup>\*a,e</sup>*E-mail: jumin@ajou.ac.kr; Fax: +82-31-219-1612; Tel: +82-31-219-2475*

<sup>\*b</sup>*Email: wrhwang@gnu.ac.kr; Fax: +82-55-772-1620; Tel: +82-51-772-14628*

# List of Supplementary Information

**SI Text 1.** Detailed information of numerical simulation.

**SI Table S1.** Numeric data for cell viability tests (6 repeated experiments) which were presented in Fig. 5 in the main text.

**SI Movie 1.** Sample movies for cell deformation in the cross-slot channel, which were used to obtain averaged deformability (Fig. 3): 30 fps (playback rate) at flow rate  $\leq 500 \mu\text{L/hr}$ ; 15 fps at flow rate = 1000  $\mu\text{L/hr}$ ; 8 fps at flow rate = 2000  $\mu\text{L/hr}$ ; 5 fps at flow rate = 3000  $\mu\text{L/hr}$ .

### SI Text 1. Detailed information of numerical simulation.

In this work, incompressible Newtonian flows were simulated using a commercial computational fluid dynamics software (COMSOL Multiphysics®) with the following the fluid properties:

- Fluid properties:
  - ◆ Density: 1000 kg/m<sup>3</sup>
  - ◆ Viscosity: 62 cP

The boundary conditions and finite element meshes, which were used for numerical simulations, were presented below:

- Boundary conditions and finite element meshes:

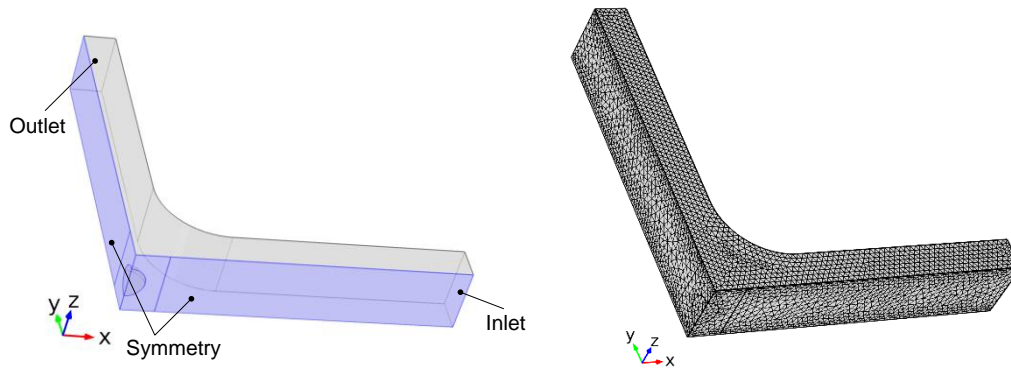

- ◆ Inlet:  $\dot{m} = 1/4 \rho \dot{Q}$
- ◆ Outlet:  $P_{out} = 0$
- ◆ Symmetry
- ◆ Others: No slip

- Mesh information

- ◆ Degree of freedom : 405,405
- ◆ Number of element : 76,197

where  $\dot{m}$  is mass rate at the inlet,  $\rho$  is fluid density and  $\dot{Q}$  denotes volumetric flow rate. The pressure at the outlet ( $P_{out}$ ) was set to 0.

**SI Table S1. Numeric data for cell viability tests (6 repeated experiments) which were presented in Fig. 5 in the main text.**

---

**Viability of CHO-k1 cell**

---

|     | 500 $\mu\text{L/hr}$ |            | 1000 $\mu\text{L/hr}$ |            | 1500 $\mu\text{L/hr}$ |            |
|-----|----------------------|------------|-----------------------|------------|-----------------------|------------|
|     | Control              | Experiment | Control               | Experiment | Control               | Experiment |
| 1st | 90.9                 | 89.7       | 89.1                  | 86.2       | 90.0                  | 82.0       |
| 2nd | 88.2                 | 87.7       | 91.6                  | 85.2       | 85.8                  | 81.5       |
| 3rd | 88.4                 | 88.2       | 89.7                  | 86.0       | 87.4                  | 84.0       |
| 4th | 88.6                 | 90.2       | 93.5                  | 86.7       | 92.2                  | 86.0       |
| 5th | 93.3                 | 96.0       | 95.1                  | 92.2       | 92.8                  | 87.4       |
| 6th | 87.7                 | 84.6       | 86.8                  | 83.1       | 85.6                  | 76.2       |
